# Supplementary material for: Unravelling exceptional acetylene and carbon dioxide adsorption within a tetra-amide functionalized metal-organic framework
Source: PubMed Central journal article supplement (PMC5309720; doi:10.1038/ncomms14085), 2017-02-08
Supplement: ncomms14085-s1.pdf [file ncomms14085-s1.pdf]

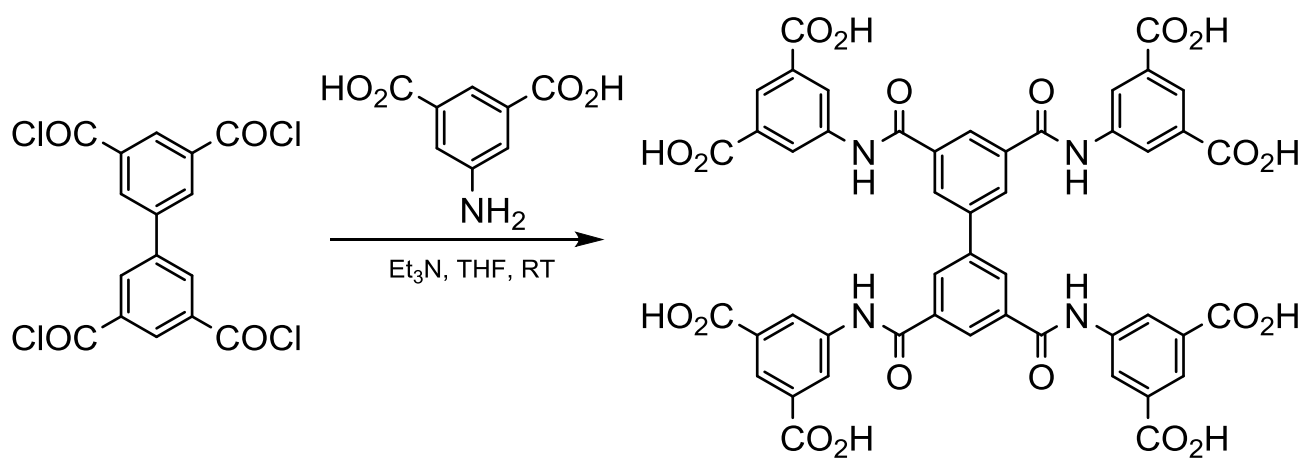

**Supplementary Figure 1.** Synthetic route to the organic ligand  $H_8L$ .

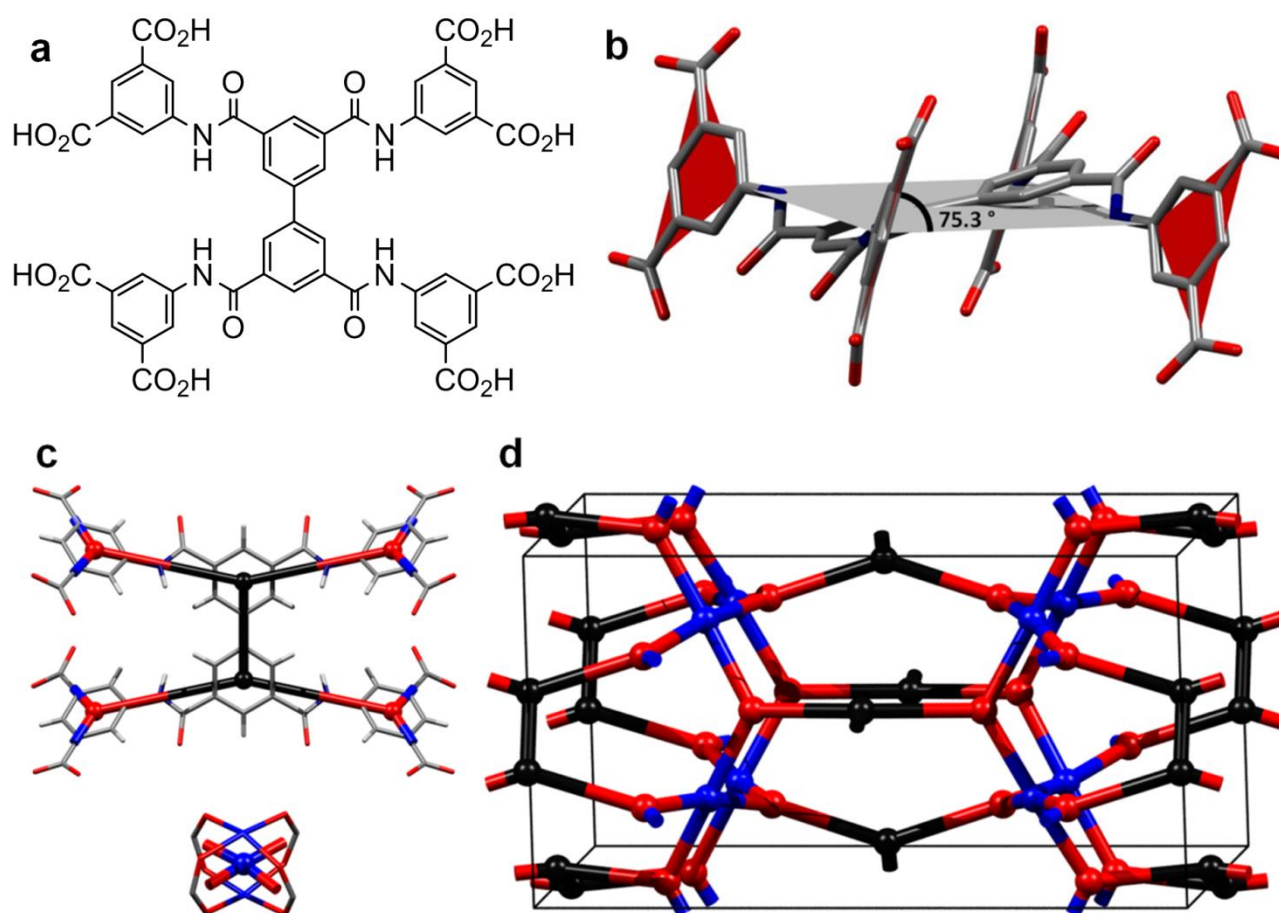

**Supplementary Figure 2. Chemical structure of the organic ligand  $H_8L$  and the topological analysis of **MFM-188**.** View of the chemical structure of the ligand  $H_8L$  (a) and the representation of its conformation in **MFM-188** (b). Topological simplifications of the organic ligand and  $\{Cu_2\}$  paddle-wheel (c) and the overall 3,3,4-c *lwg* network (d) (4-c nodes from the paddlewheels in blue, 3-c nodes from the isophthalates in red and 3-c nodes from the biphenyl core in black).

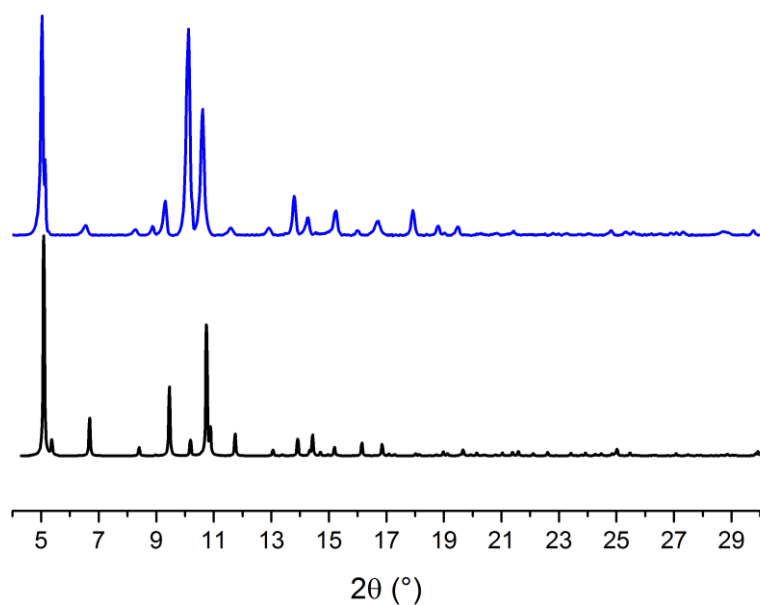

**Supplementary Figure 3.** Experimental and simulated (from the single crystal structure) PXRD patterns of MFM-188a. The experimental pattern was collected under inert atmosphere using a desolvated sample.

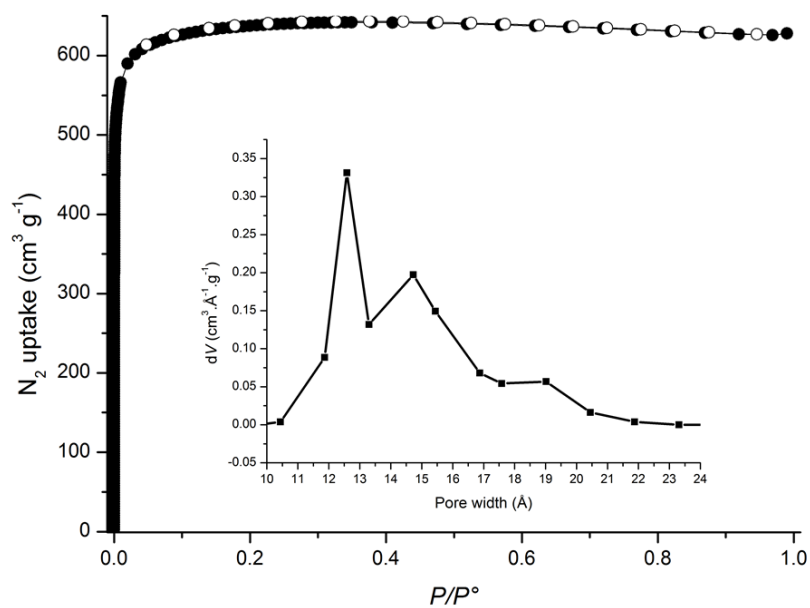

**Supplementary Figure 4.** N<sub>2</sub> sorption isotherm for MFM-188a at 77 K. Insert plot shows the pore size distribution.

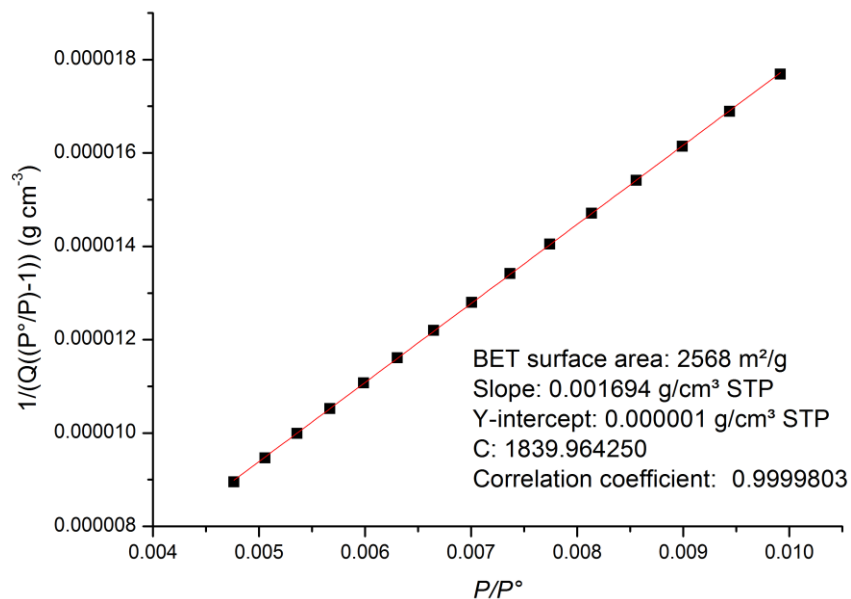

**Supplementary Figure 5.** The BET plot derived from N<sub>2</sub> uptake of MFM-188a.

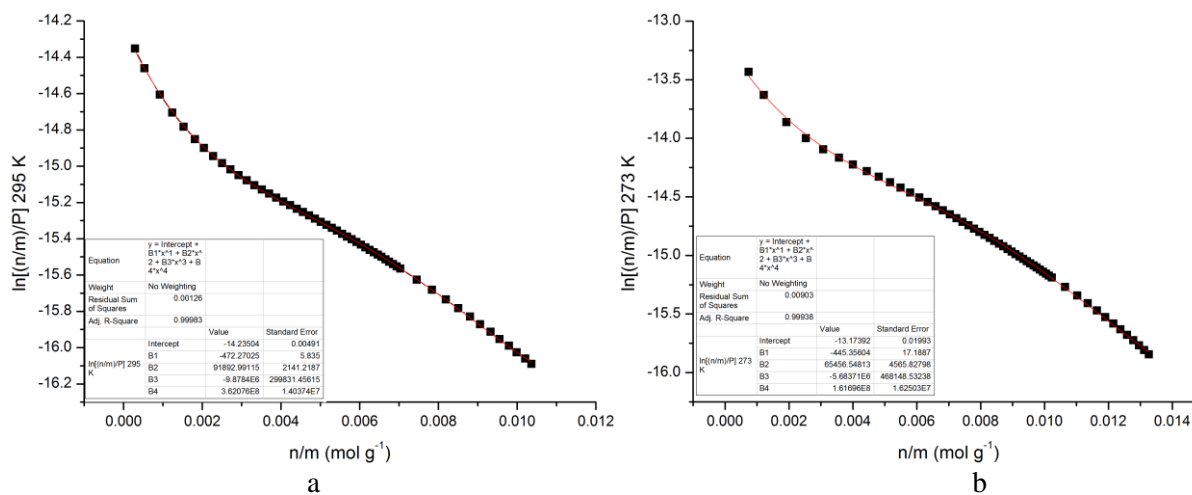

**Supplementary Figure 6.** Virial fitting of C<sub>2</sub>H<sub>2</sub> adsorption isotherm at 295 K (a) and 273 K (b).

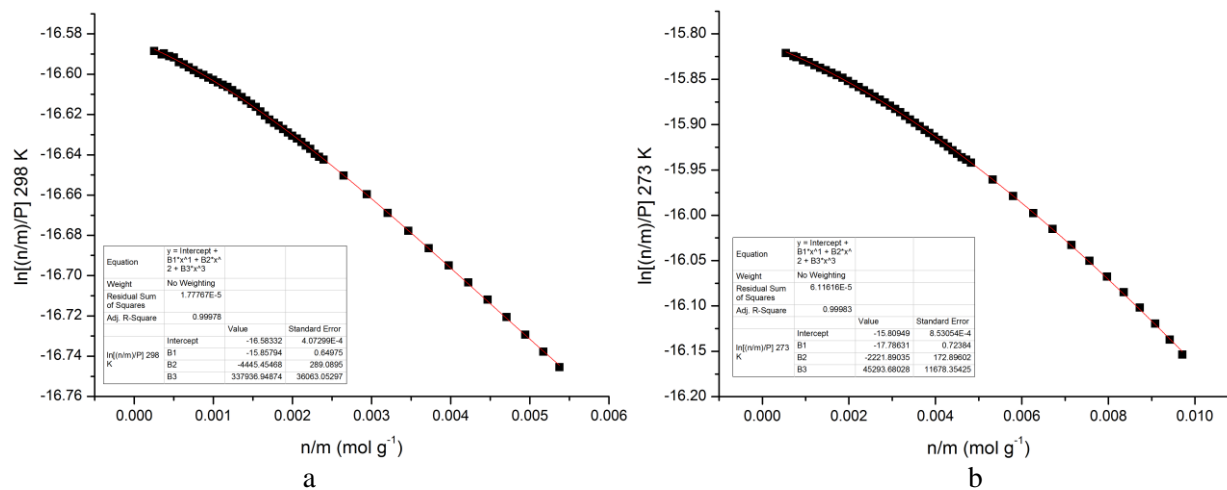

**Supplementary Figure 7.** Virial fitting of CO<sub>2</sub> adsorption isotherm at 298 K (a) and 273 K (b).

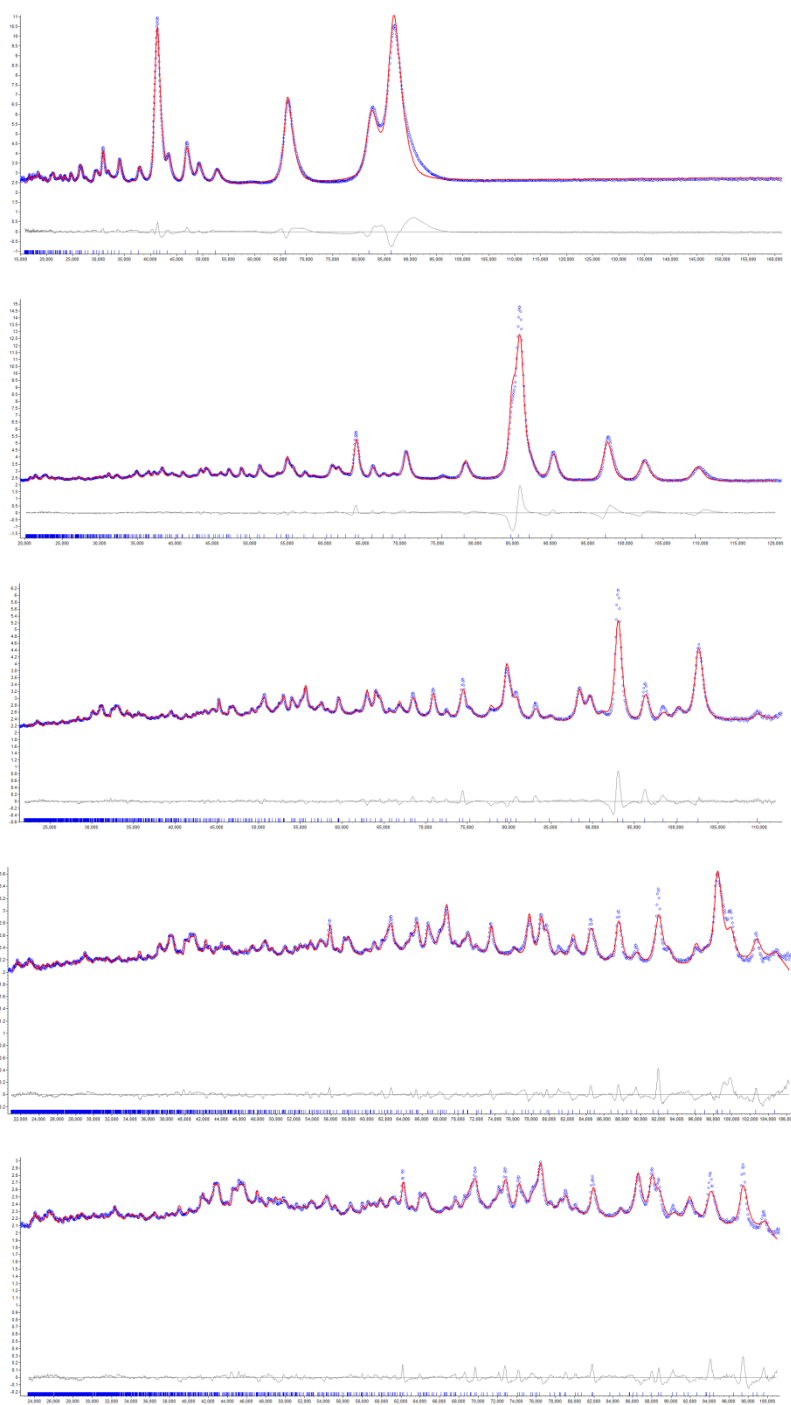

**Supplementary Figure 8.** Neutron diffraction pattern and Rietveld refinement for desolvated MFM-188a (banks 1 to 5)

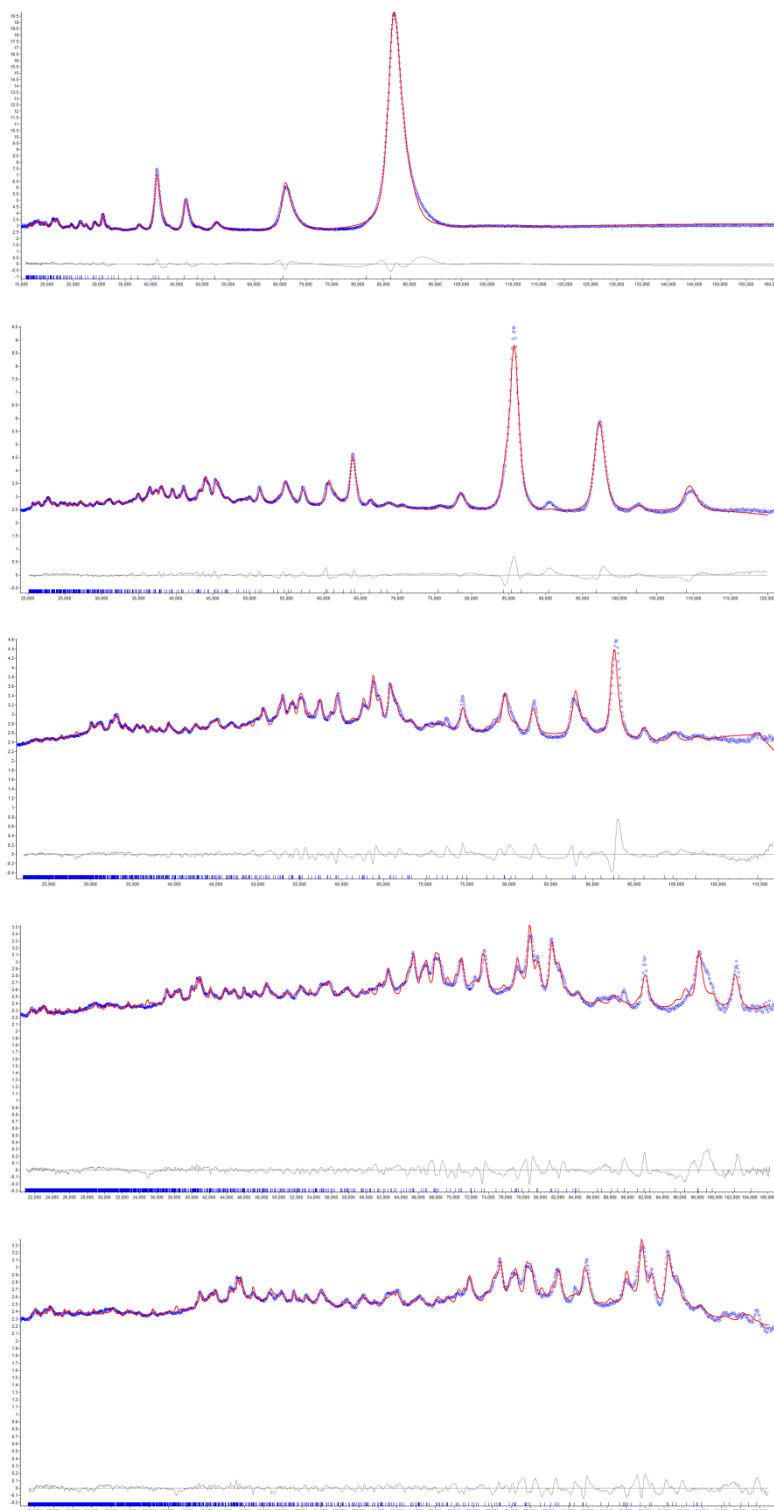

**Supplementary Figure 9.** Neutron diffraction pattern and Rietveld refinement for  $3.157\text{C}_2\text{D}_2$ @ MFM-188 (banks 1 to 5)

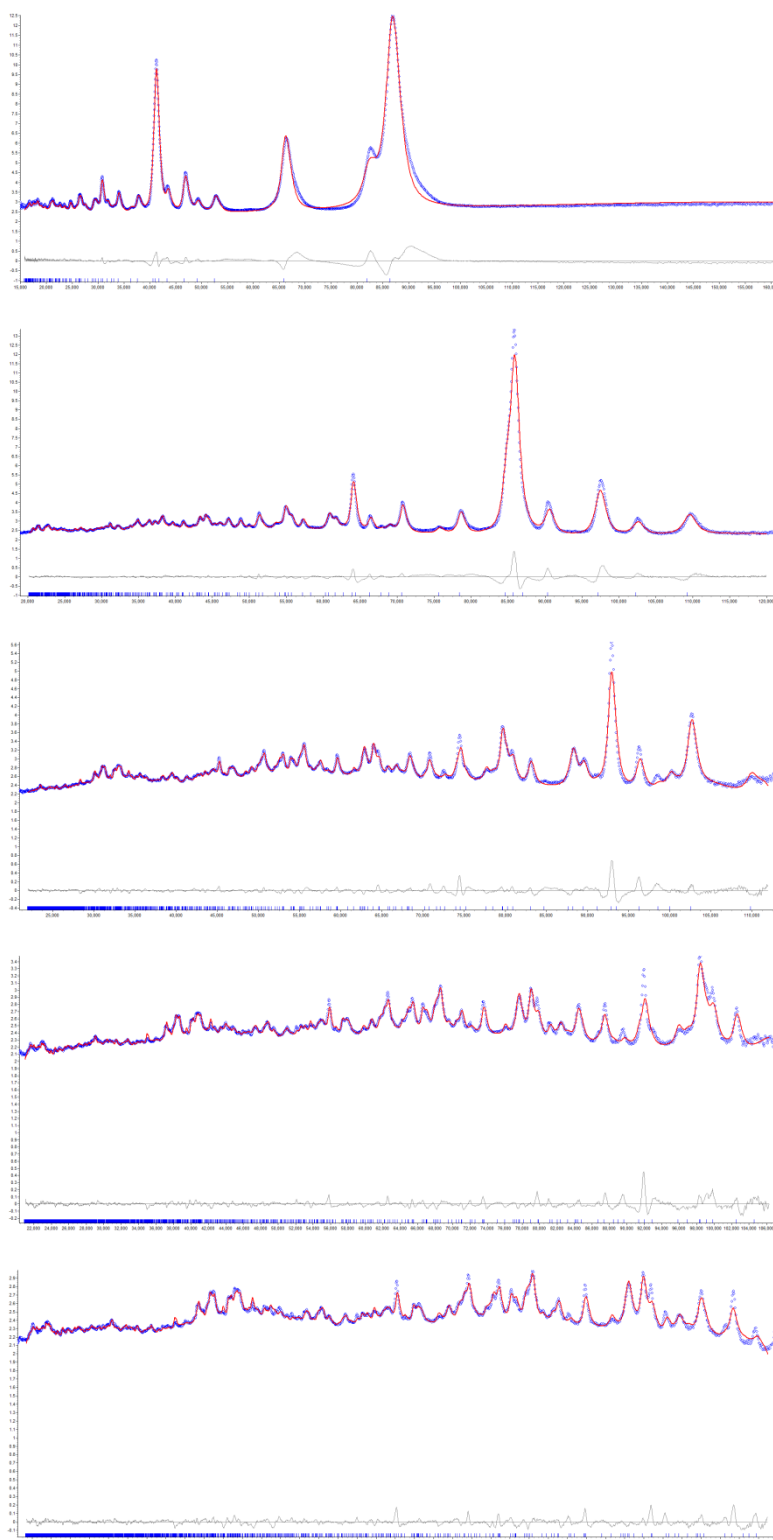

**Supplementary Figure 10.** Neutron diffraction pattern and Rietveld refinement for  $1.75\text{CO}_2@ \text{MFM-188}$  (banks 1 to 5)



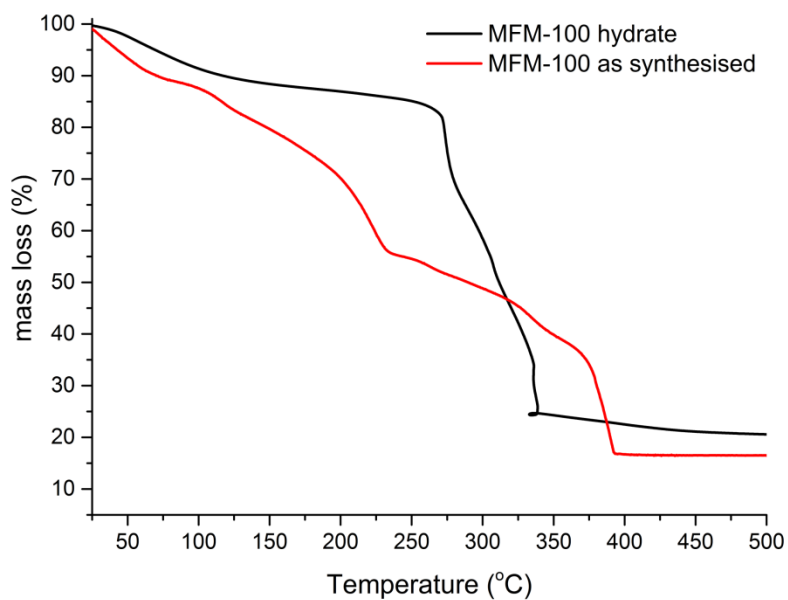

**Supplementary Figure 11.** TGA plots MFM-188 as synthesized (red) and after desolvation and exposure to ambient conditions (black).

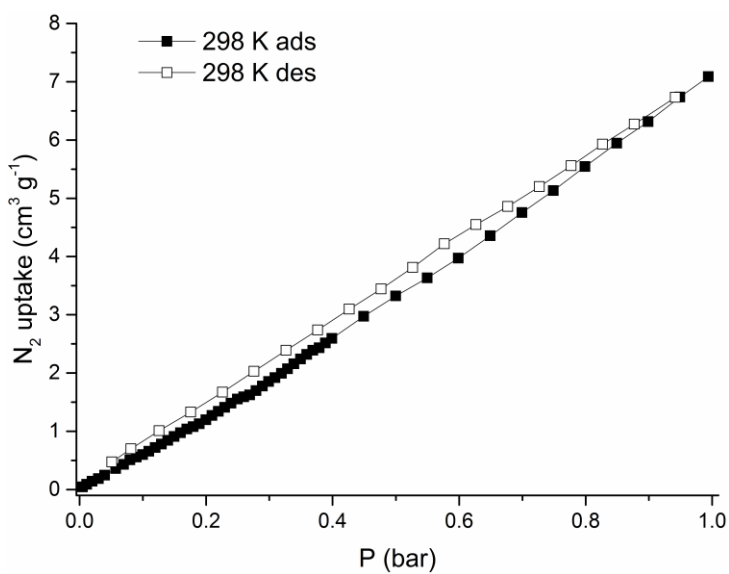

**Supplementary Figure 12.** N<sub>2</sub> sorption isotherm for MFM-188a at 298 K.

**Supplementary Table 1.** Single crystal data and structure refinement details for MFM-188.

|                                                                            |                                                                                   |
|----------------------------------------------------------------------------|-----------------------------------------------------------------------------------|
| Identification code                                                        | MFM-188                                                                           |
| Chemical formula                                                           | (C <sub>48</sub> H <sub>30</sub> Cu <sub>4</sub> O <sub>24</sub> N <sub>4</sub> ) |
| $M_r$ (g mol <sup>-1</sup> )                                               | 1300.96                                                                           |
| Crystal system, space group                                                | Tetragonal, <i>P4/mnc</i>                                                         |
| Temperature (K)                                                            | 120                                                                               |
| $a, c$ (Å)                                                                 | 18.6841 (7), 34.6796 (17)                                                         |
| $V$ (Å <sup>3</sup> )                                                      | 12106.5 (9)                                                                       |
| $Z$                                                                        | 4                                                                                 |
| Radiation type                                                             | Cu $K\alpha$                                                                      |
| $\mu$ (mm <sup>-1</sup> )                                                  | 2.24                                                                              |
| Crystal size (mm)                                                          | 0.14 × 0.14 × 0.01                                                                |
| Absorption correction                                                      | Gaussian.                                                                         |
| $T_{\min}, T_{\max}$                                                       | 0.747, 0.973                                                                      |
| No. of measured, independent and observed [ $I > 2\sigma(I)$ ] reflections | 44853, 6006, 3021                                                                 |
| $R_{\text{int}}$                                                           | 0.165                                                                             |
| ( $\sin \theta / \lambda$ ) <sub>max</sub> (Å <sup>-1</sup> )              | 0.625                                                                             |
| $R[F^2 > 2\sigma(F^2)], wR(F^2), S$                                        | 0.086, 0.275, 0.92                                                                |
| No. of reflections                                                         | 6006                                                                              |
| No. of parameters                                                          | 185                                                                               |
| H-atom treatment                                                           | H-atom parameters constrained                                                     |
| $\Delta\rho_{\text{max}}, \Delta\rho_{\text{min}}$ (e Å <sup>-3</sup> )    | 1.26, -0.42                                                                       |

**Supplementary Table 2.** Crystal data and details of the structure determination for C<sub>2</sub>D<sub>2</sub>@MFM-188 and CO<sub>2</sub>@MFM-188.

|                              | Desolvated<br>MFM-188a                                                            | <b>3.157C<sub>2</sub>D<sub>2</sub>@MFM-188</b>                                                                            | <b>1.75CO<sub>2</sub>@MFM-188</b>                                                                          |
|------------------------------|-----------------------------------------------------------------------------------|---------------------------------------------------------------------------------------------------------------------------|------------------------------------------------------------------------------------------------------------|
| Formula                      | (C <sub>48</sub> H <sub>30</sub> Cu <sub>4</sub> O <sub>24</sub> N <sub>4</sub> ) | (C <sub>48</sub> H <sub>30</sub> Cu <sub>4</sub> O <sub>24</sub> N <sub>4</sub> ) · 3.157(C <sub>2</sub> D <sub>2</sub> ) | (C <sub>48</sub> H <sub>30</sub> Cu <sub>4</sub> O <sub>24</sub> N <sub>4</sub> ) · 1.75(CO <sub>2</sub> ) |
| Crystal System               | Tetragonal                                                                        | Tetragonal                                                                                                                | Tetragonal                                                                                                 |
| Space group                  | <i>P4/mnc</i>                                                                     | <i>P4/mnc</i>                                                                                                             | <i>P4/mnc</i>                                                                                              |
| <i>a, b</i> [Å]              | 18.7721(4)                                                                        | 18.6680(6)                                                                                                                | 18.7471(5)                                                                                                 |
| <i>c</i> [Å]                 | 34.7704(14)                                                                       | 34.8250(15)                                                                                                               | 34.8339(18)                                                                                                |
| <i>V</i> [Å <sup>3</sup> ]   | 12252.8(7)                                                                        | 12136.3(9)                                                                                                                | 12242.5(9)                                                                                                 |
| D(calc) [g/cm <sup>3</sup> ] | 0.83341                                                                           | 0.85245                                                                                                                   | 0.83424                                                                                                    |
| Radiation type               | Neutron                                                                           | Neutron                                                                                                                   | Neutron                                                                                                    |
| Scan method                  | Time of Flight                                                                    | Time of Flight                                                                                                            | Time of Flight                                                                                             |
| R <sub>exp</sub>             | 0.29                                                                              | 0.28                                                                                                                      | 0.28                                                                                                       |
| R <sub>wp</sub>              | 1.87                                                                              | 1.86                                                                                                                      | 1.90                                                                                                       |
| R <sub>p</sub>               | 1.69                                                                              | 1.81                                                                                                                      | 1.77                                                                                                       |
| GoF                          | 6.49                                                                              | 6.63                                                                                                                      | 6.72                                                                                                       |
